# Supplementary material for: DNA barcodes analyses provide insights into species delineation and possible cryptic species in Amentotaxus (Taxaceae)
Source: Research Square preprint supplement (doi:10.21203/rs.3.rs-8661474/v1), 2026-02-02

**Supporting Information**

**Table S1** Species discrimination of DNA barcodes, plastome, nrDNA, and their combinations as well as ten selected hypervariable plastome loci based on genetic distance (barcoding gap) analyses across *Amentotaxus*. “Y” indicates successful identification of the corresponding species, whereas “N” indicates failure to discriminate the species.

| DNA barcode | *A. yunnanensis* | *A. argotaenia* | *A. poilanei* | *A. assamica* | *A. formosana* | *A. hekouensis* | discrimination rate |
| --- | --- | --- | --- | --- | --- | --- | --- |
| ITS | Y | N | N | Y | Y | N | 3 (50%) |
| *rbc*L*+mat*K*+trn*H*-psb*A | Y | N | N | N | Y | N | 2(33.3%) |
| *rbc*L*+mat*K*+trn*H*-psb*A+ITS | Y | Y | N | Y | Y | N | 4 (66.7%) |
| nrDNA | Y | N | N | Y | Y | N | 3 (50%) |
| Plastome | Y | Y | Y | N | Y | N | 4 (66.7%) |
| plastome+nrDNA | Y | Y | Y | N | Y | N | 4 (66.7%) |
| *rrn*16*-trn*V | N | Y | N | N | Y | N | 2 (33.3%) |
| *trn*L*-*F | Y | Y | N | N | Y | N | 3 (50%) |
| *trn*R*-ndh*F | N | N | N | N | Y | N | 1 (16.7%) |
| *clp*P*-rps*12 | Y | Y | Y | N | Y | N | 4 (66.7%) |
| *acc*D | N | Y | Y | N | Y | N | 3 (50%) |
| *trn*L-UAA | Y | N | N | N | Y | N | 2 (33.3%) |
| *ycf*1*-chl*N | Y | N | N | N | Y | N | 2 (33.3%) |
| *acc*D*-rbc*L | Y | N | N | N | Y | N | 2 (33.3%) |
| *psb*M*-trn*D | N | Y | Y | N | Y | N | 3 (50%) |
| *ndh*C*-trn*V | N | N | N | N | Y | N | 1 (16.7%) |

**Figure S1** The Distribution of the 23 *Amentotaxus* samples used in this study.


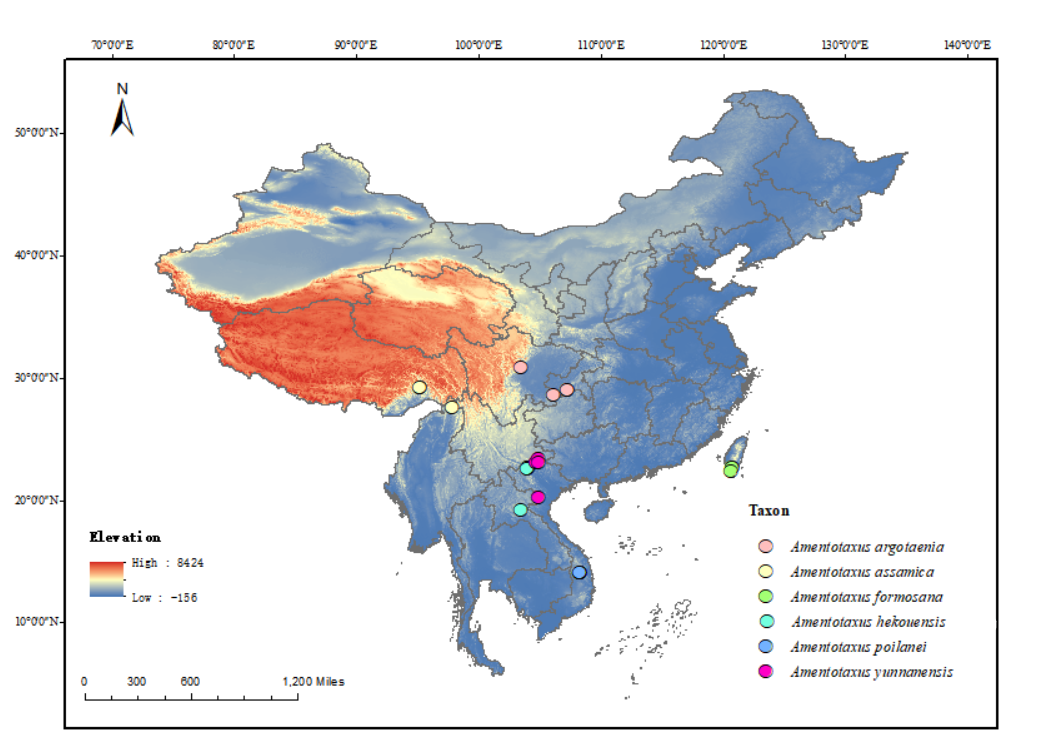


**Figure S2** Sequence alignment of 23 *Amentotaxus* chloroplast genomes using mVISTA program. The top line shows genes in order (transcriptional direction indicated with arrow). A cut-off of 70 % identity was used for the plots, and the Y-scale represents the percent identity between 50 and 100 %. Genome regions are color coded as exon, t/rRNA, and conserved non-coding sequences (CNS).


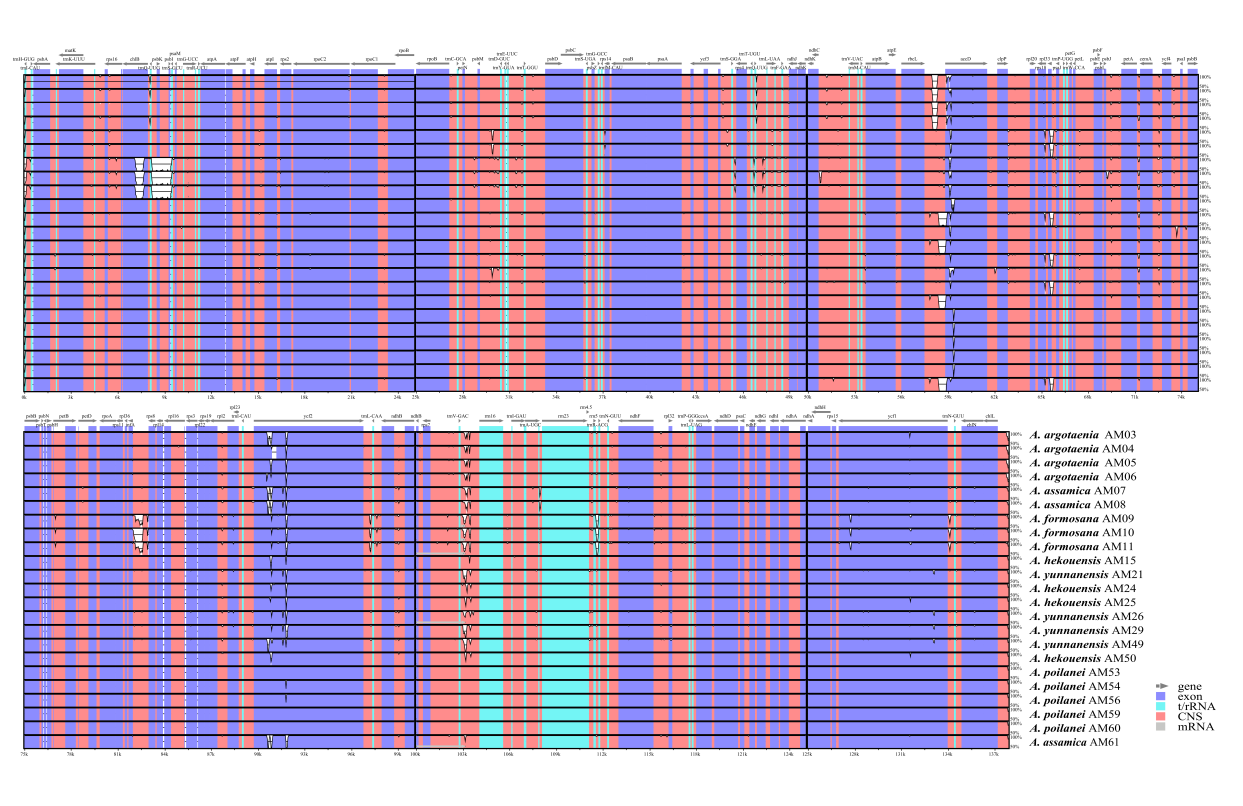


**Figure S3** Maximum likelihood tree constructed based on ITS. Bootstrap support (BS) values are given for each taxon node, with “*” indicating BS = 100%.


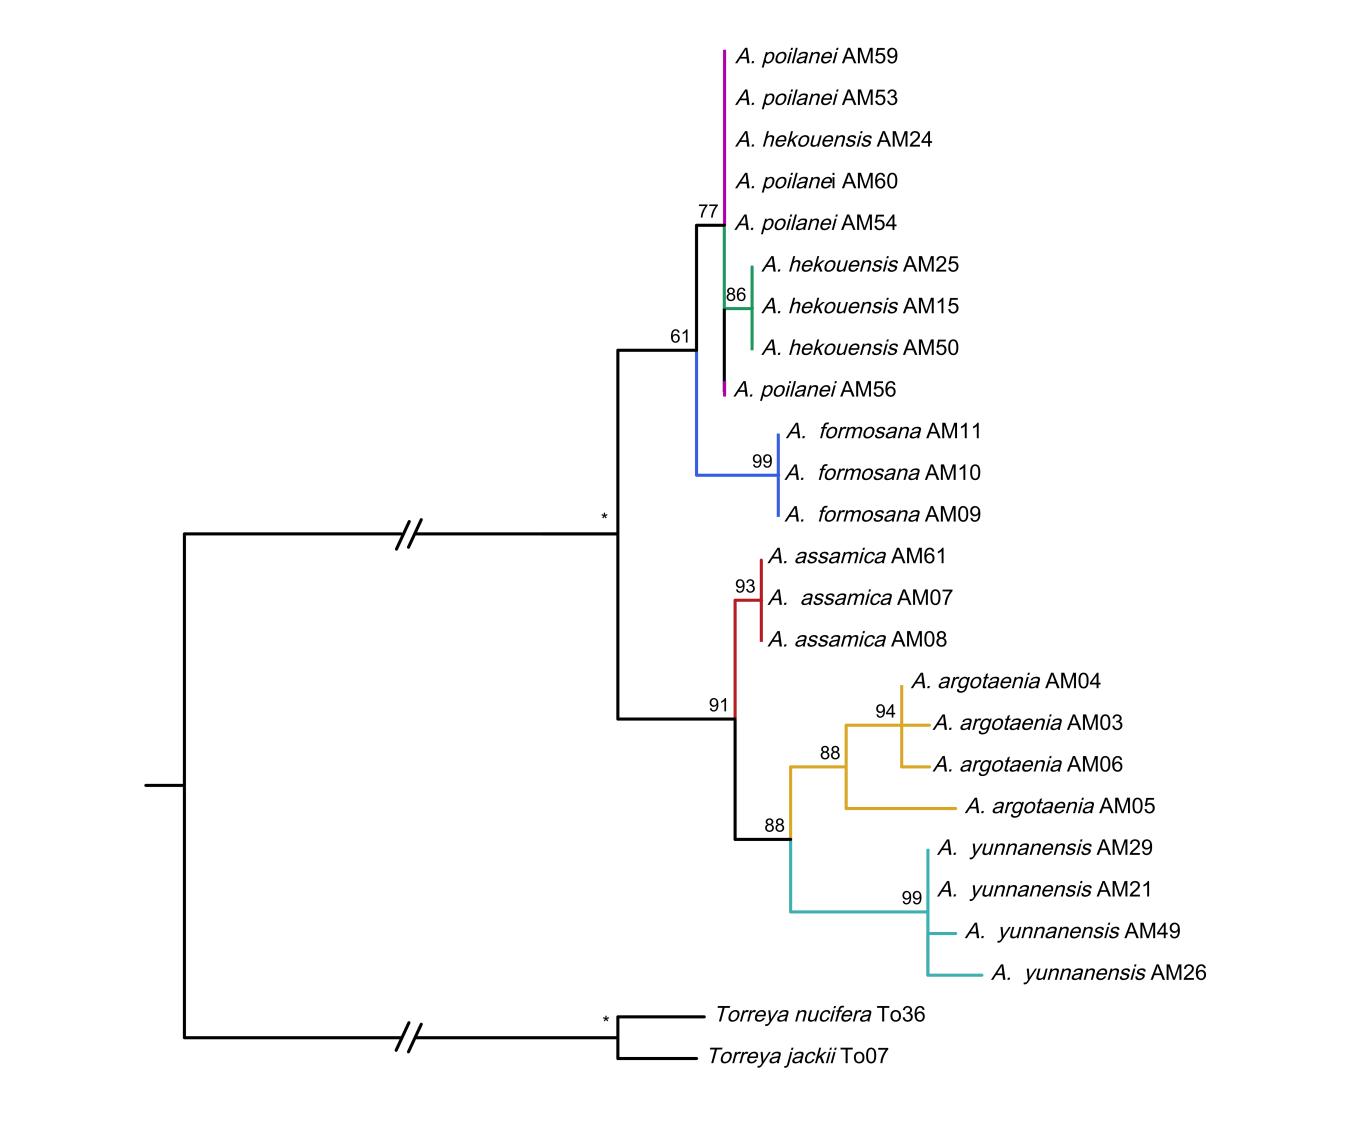


**Figure S4** Maximum likelihood tree constructed based on the combination of *rbc*L+*mat*K+*trn*H*-psb*A. Bootstrap support (BS) values are given for each taxon node, with “*” indicating BS = 100%.


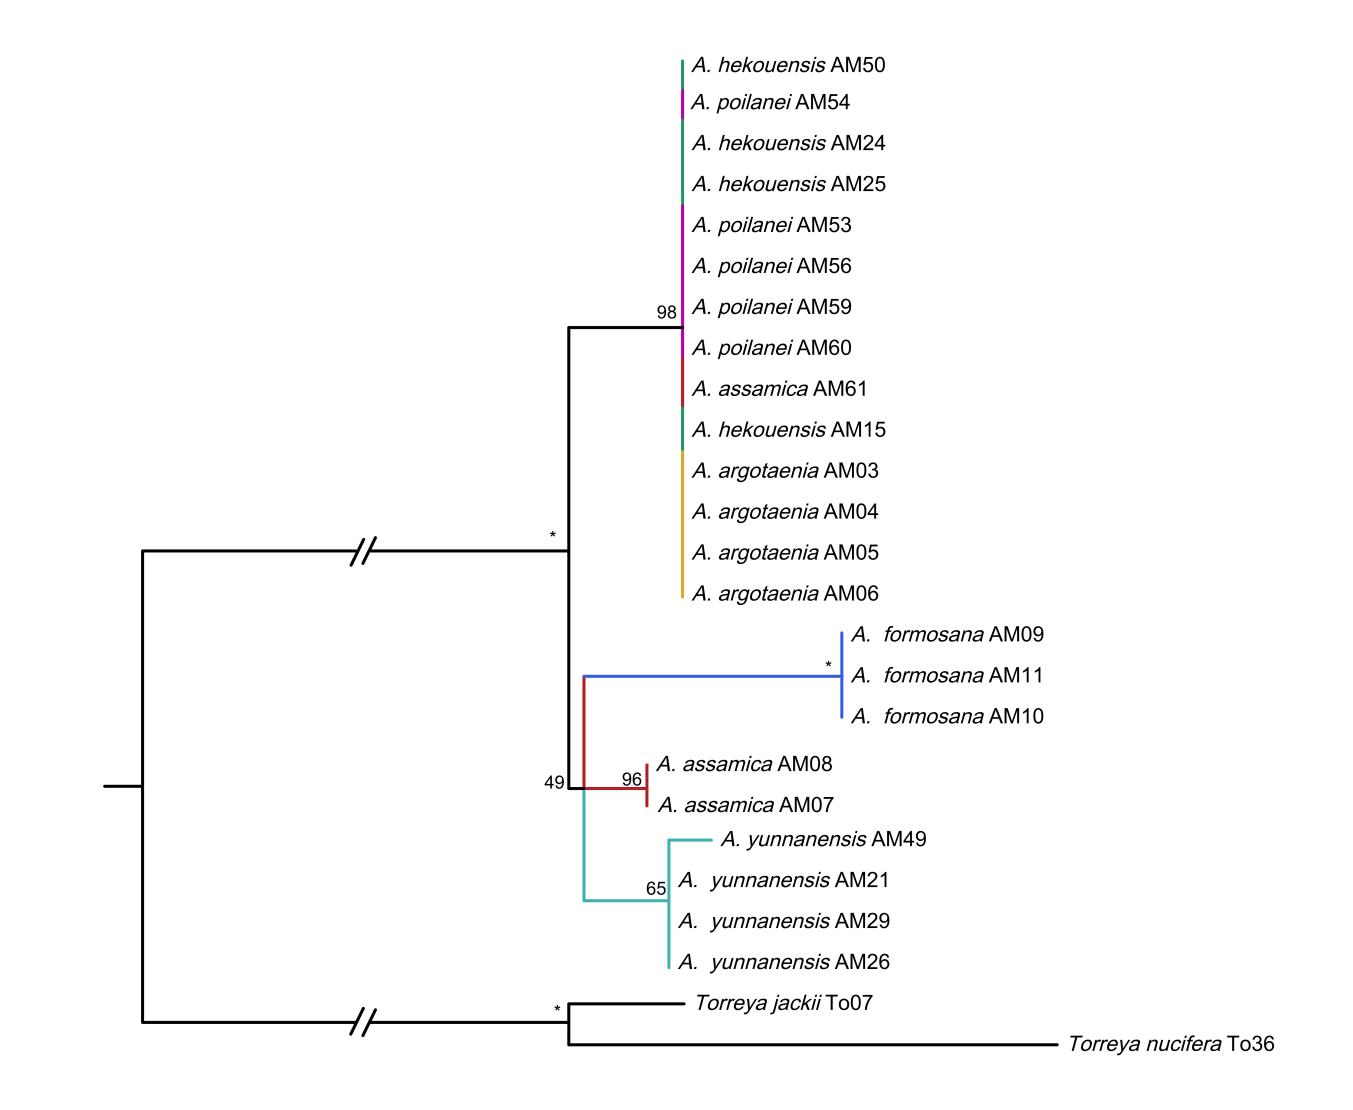


**Figure S5** Maximum likelihood tree constructed based on the combination of *rbc*L+*mat*K+*trn*H*-psb*A+ITS. Bootstrap support (BS) values are given for each taxon node, with “*” indicating BS = 100%.


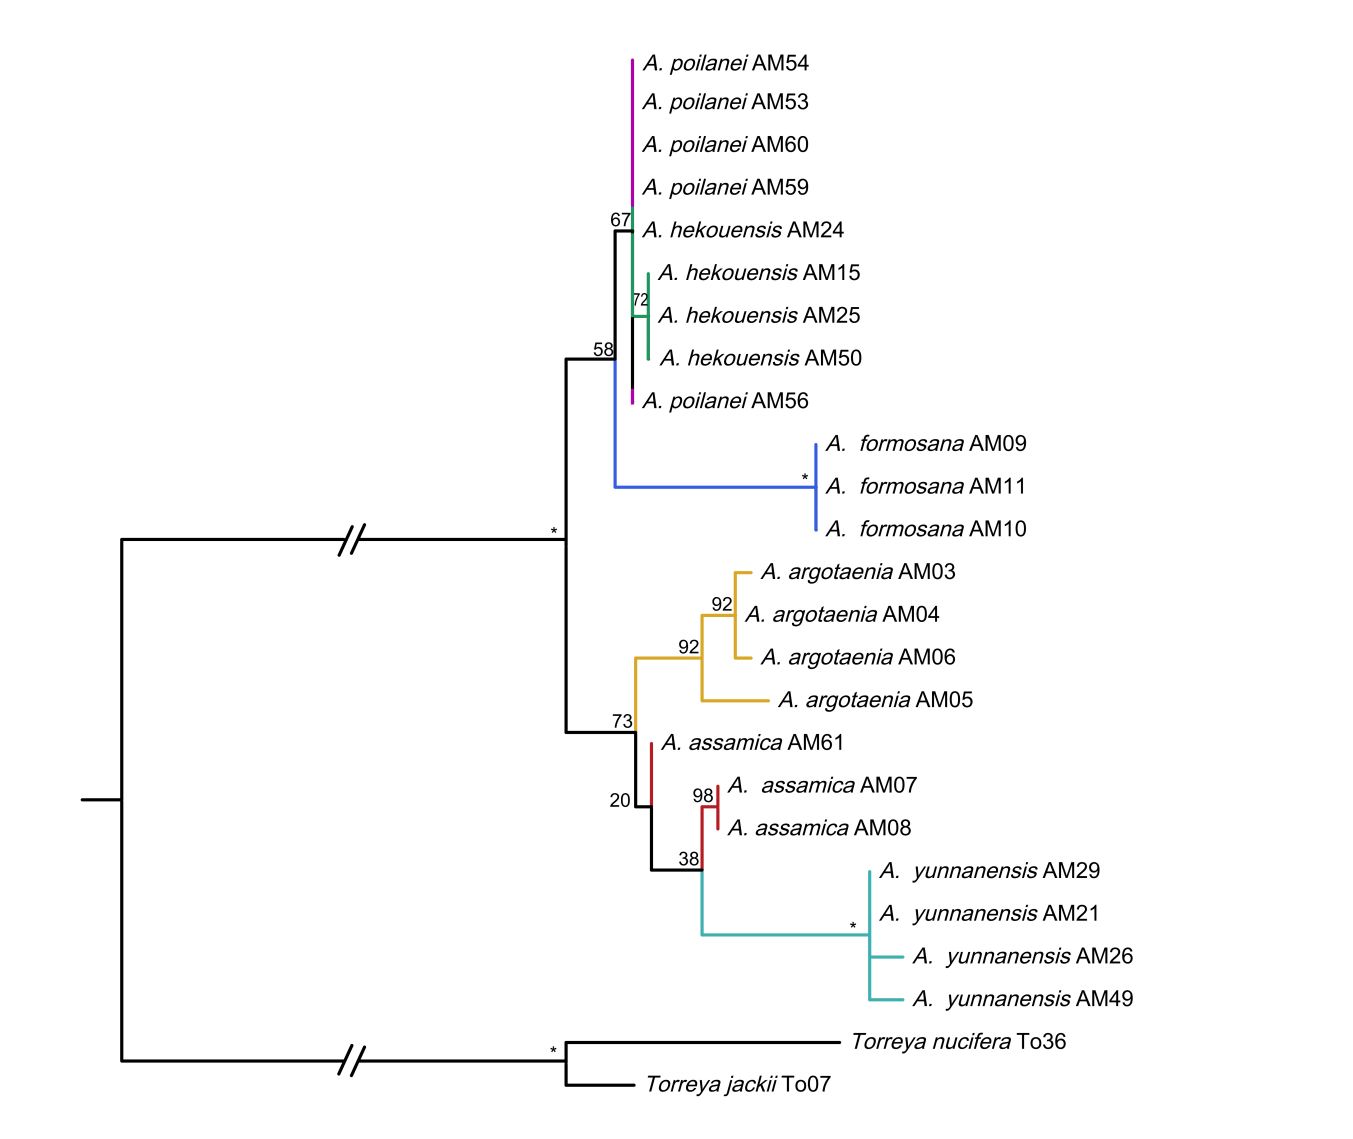


**Figure S6** Maximum likelihood tree constructed based on the next generation barcode (plastome + nrDNA). Bootstrap support (BS) values are given for each taxon node, with “*” indicating BS = 100%.


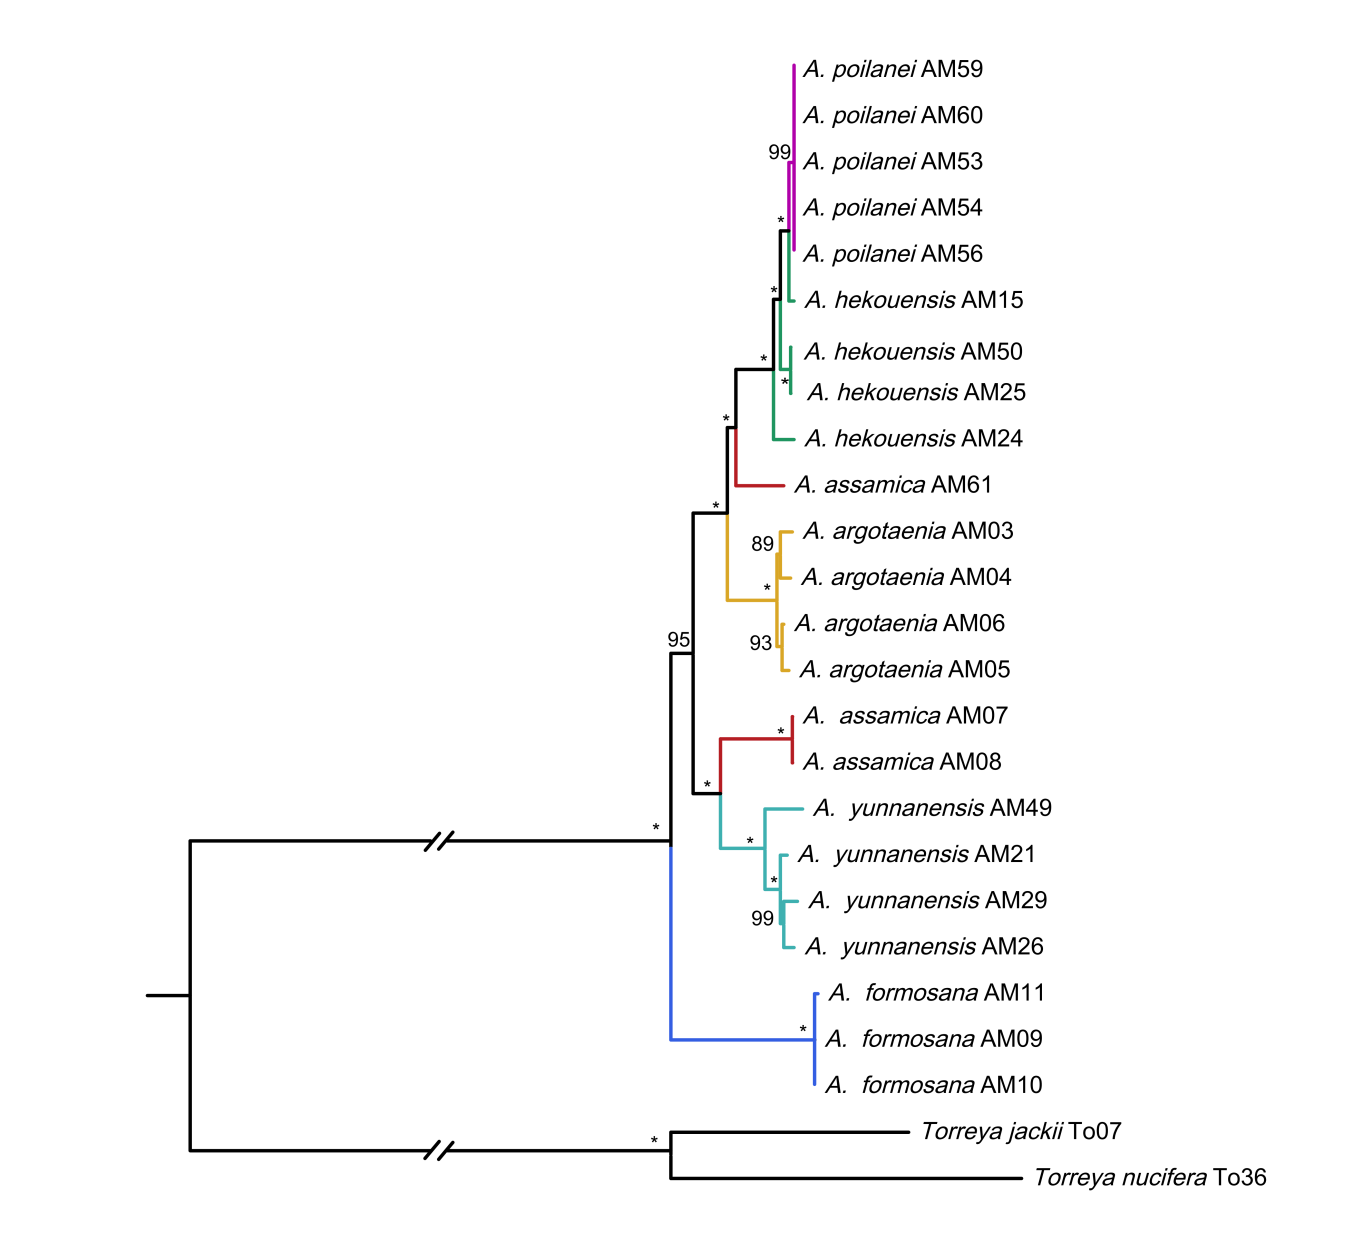


**Figure S7** Maximum likelihood tree constructed based on the plastid *clp*P-*rps*12 region. Bootstrap support (BS) values are given for each taxon node, with “*” indicating BS = 100%.


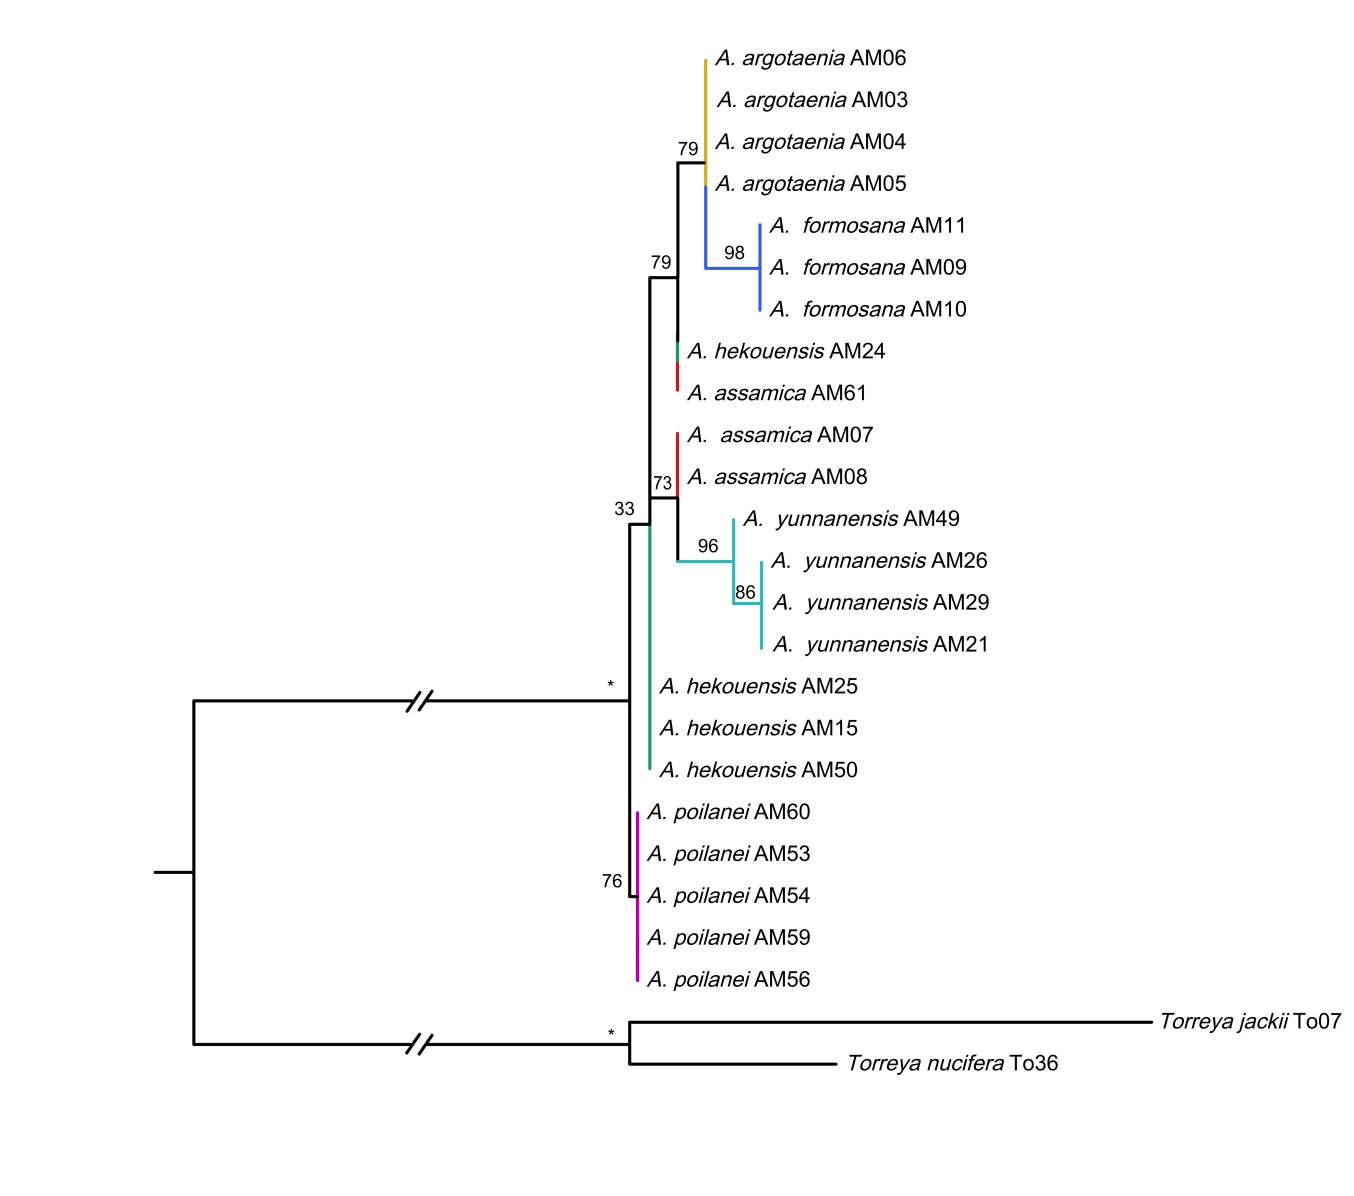


**Figure S8** Photograph of type specimen of *Amentotaxus poilanei* (left) and *A. hekouensis* (right), respectively.


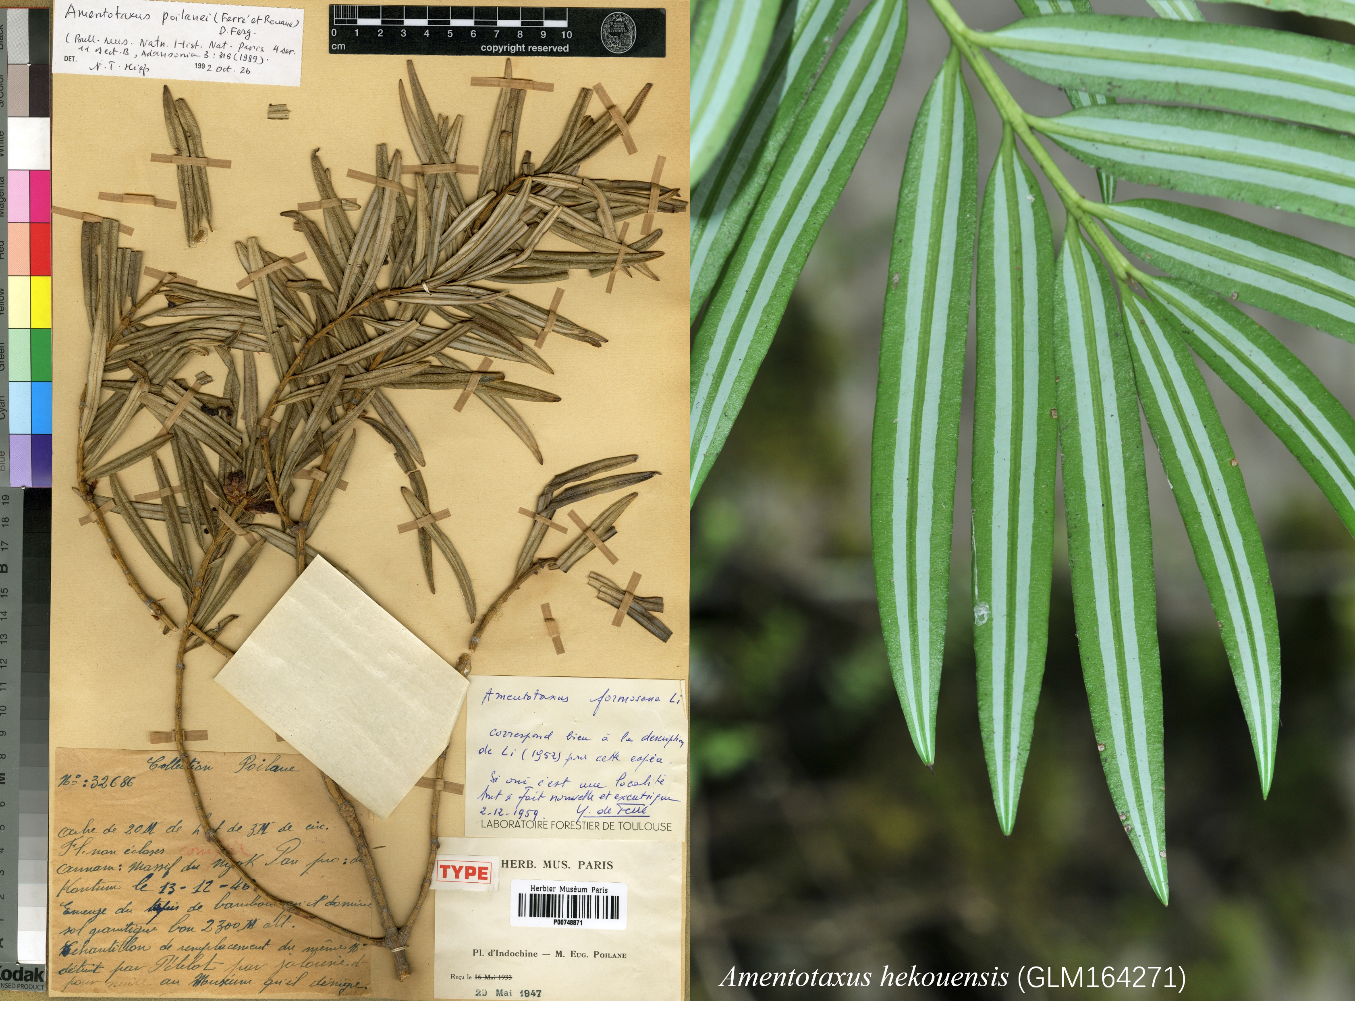

Supplement: Supplementary file 1 [file 155438c517df02c4fb53a22e.docx]
